# Supplementary material for: Movement Disorders and Mortality in Severely Mentally Ill Patients: The Curacao Extrapyramidal Syndromes Study XIV
Source: Oxford University Press journal article supplement (doi:10.1093/schbul/sbac037), 2022-03-25
Supplement: sbac037_suppl_supplementary-material.doc [file sbac037_suppl_supplementary-material.doc]

**Supplementary materials**

**Suppl. Figure 1. Survival function adjusted for parkinsonism**

**Suppl. Figure 2. Survival function adjusted age**

**Suppl. Figure 3. Survival function adjusted for Defined Daily Dose (DDD) antipsychotics**
